# Supplementary material for: LC-MS/MS Analysis of Fumonisin B1, B2, B3, and Their Hydrolyzed Metabolites in Broiler Chicken Feed and Excreta
Source: MDPI journal article supplement (doi:10.3390/toxins14020131), 2022-02-09
Supplement: s1 [file s1]

# LC-MS/MS Analysis of Fumonisin B1, B2, B3, and Their Hydrolyzed Metabolites in Broiler Chicken Feed and Excreta

Shuo Zhang, Shuang Zhou, Song Yu, Yunfeng Zhao, Yongning Wu and Aibo Wu

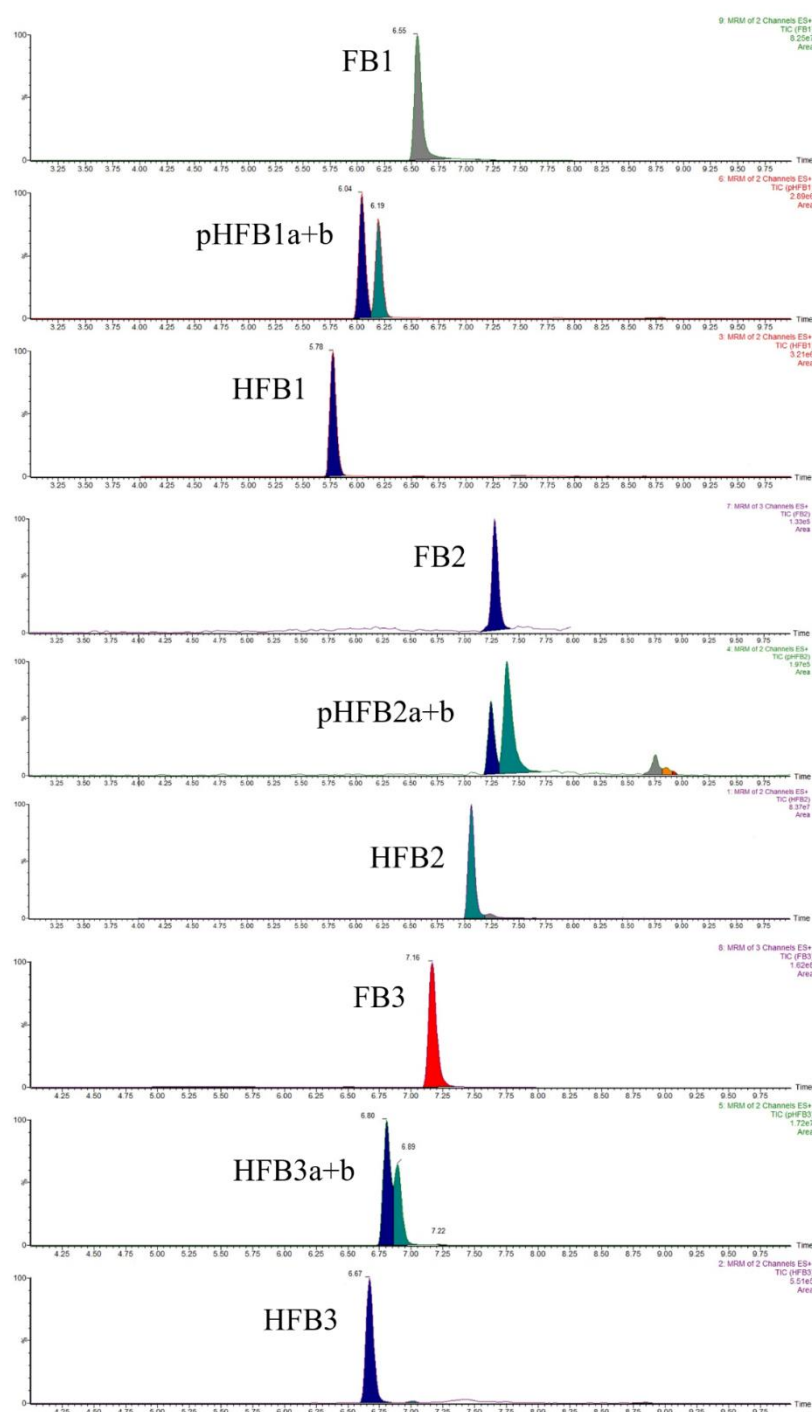

**Figure S1.** The LC-MS/MS chromatograms the FB1, FB2, FB3, pHFB1a+b, pHFB2a+b, pHFB3a+b, HFB1, HFB2, and HFB3 in the hydrolysis reaction.

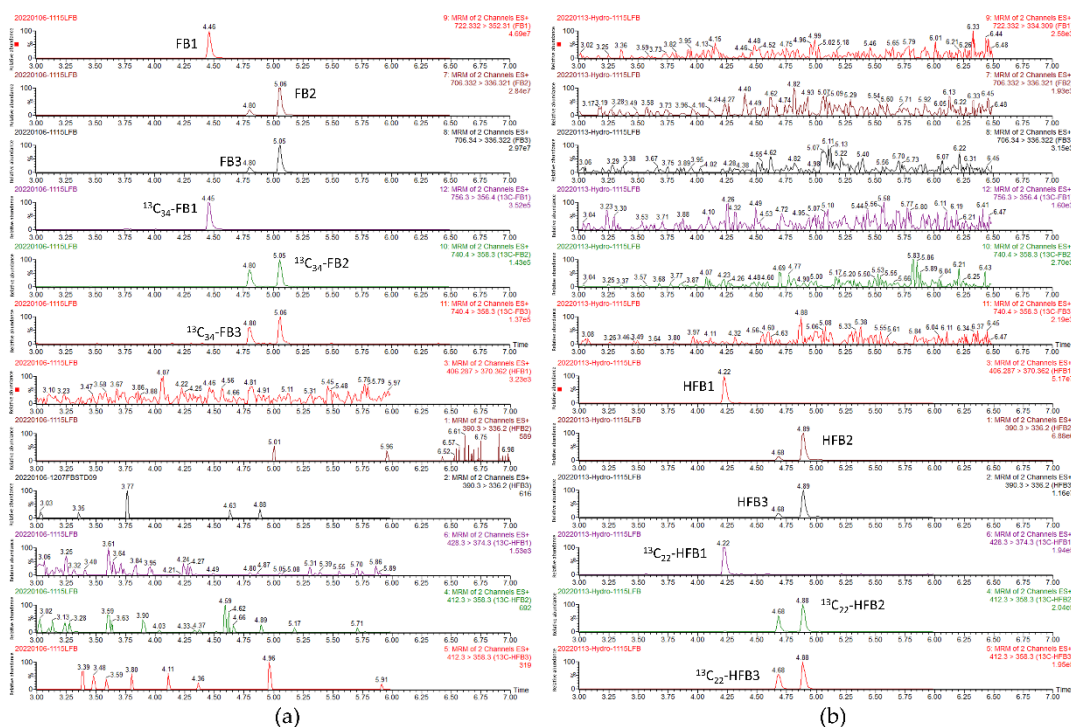

**Figure S2.** The LC-MS/MS chromatograms of the analytes in a real sample before (a) and after (b) hydrolysis.
